# Supplementary material for: Decreased serum MG53 levels are associated with SHBG and androgen excess in women with polycystic ovary syndrome
Source: Sci Rep. 2026 Apr 13;16:15753. doi: 10.1038/s41598-026-48800-z (PMC13190848; doi:10.1038/s41598-026-48800-z)
Supplement: Supplementary file 1 — Supplementary Material 1 [file 41598_2026_48800_MOESM1_ESM.xlsx]

## Sheet: Sayfa1
	PCOS(YOK-0, VAR-1)	YAŞ	BMI	MENARŞ YAŞI	MENSTRÜEL SİKLUS (1-DÜZENLİ, 2-OLİGOMENORE, 3-AMENORE)	HİRŞUTİZM (YOK-0, VAR-1)	AKNE VARLIĞI (YOK-0 , VAR 1)	EN BÜYÜK OVER BOYUTU (CM3)	SOL OVER FOLİKÜL SAYISI	SAĞ OVER FOLİKÜL SAYISI	GEBELİK GEÇMİŞİ (YOK-0, VAR-1)	ABORT ÖYKÜSÜ (YOK-0, VAR-1)	İNFERTİLİTE ÖYKÜSÜ (YOK-0, VAR-1)	SİGARA KULLANIMI (YOK-0, VAR-1)	ALKOL KULLANIMI (YOK-0, VAR-1)	FSH (IU/L)	LH (IU/L)	LH/FSH ORANI	TOTAL TESTESTERON (ug/L)	SEKS HORMON BAĞLAYICI GLOBULİN(nmol/L)	AMH (ng/ml)	PROLAKTİN(ng/ml)	TSH(mIU/L))	GLUKOZ (mg/dl)	İNSÜLİN(mU/L)	HOMA -IR	TOTAL KOLESTEROL(mg/dl)	HDL(mg/dl)	LDL(mg/dl)	TRİGLİSERİT(mg/dl)	AST(U/L)	ALT(U/L)	CRP(mg/L)	SEDİMENTASYON (mm/hour)	TRİPARTİTE MOTİF CONTAİNİNG PROTEİN 72 (TRİM 72)(pg/ml)
1	1	22	22.48	12	2	0	0	11	14	9	0	0	0	0	1	6.47	3.76	0.58	0.18	180	3.74	4.97	1.57	91	11.23	2.52328	258	71	171	81	19	13	0.4	2	191.5
2	1	22	28.58	13	2	1	0	15.7	14	14	0	0	0	1	0	4.39	10.65	2.43	0.65	58	11.29	15.5	1.29	86	9.43	2.00242	131	58	54	94	13	11	0.2	6	122.6
3	1	17	28.56	12	2	1	1	13.5	9	9	0	0	0	0	0	5.6	7.16	1.28	0.39	40.6	11.25	11.39	2.15	106	12	3.14074	185	57	107	107	12	15	17	19	101.5
4	1	25	37.11	15	2	1	0	10.1	12	12	0	0	0	0	1	4.53	6.43	1.42	0.37	22.8	7.46	9.21	3.52	81	13.7	2.74	187	41	107	193	31	34	15	23	270
5	1	24	21.87	13	1	1	0	12.8	7	6	0	0	0	1	0	7.97	5.69	0.71	0.35	94.5	2.12	15.63	1.36	87	8.76	1.88178	226	63	118	223	15	25	3	25	96.9
6	1	23	28.52	12	2	1	1	17.3	17	15	0	0	0	0	0	5.18	7.36	1.42	0.44	141	14.13	13.13	1.47	92	15.45	3.50963	191	68	102	104	20	16	6	27	141.2
7	1	22	24.22	14	2	1	1	16.7	15	15	0	0	0	0	0	6.2	11.74	1.89	0.28	61	14.95	13.59	0.85	85	5.85	1.22778	295	45	183	336	16	17	18	5	156.2
8	1	30	24.98	12	1	1	0	11	12	12	1	0	1	0	0	5.95	6.5	1.09	0.29	85.7	6.75	27.98	1.97	96	5.15	1.22074	228	56	154	89	15	12	1	7	160.1
9	1	19	19.63	12	2	1	1	13.3	9	9	0	0	0	0	0	5.21	5.25	1.01	0.33	62	12.26	19.1	1.27	88	10.9	2.3684	186	51	122	64	21	31	2	9	202.3
10	1	27	25.22	12	2	1	1	18.3	12	12	0	0	0	0	0	3.55	3.56	1	0.25	60	5.87	6.54	2.64	82	7.73	1.56509	394	118	257	95	21	27	0.2	18	491.6
11	1	21	30.86	13	2	1	1	12.2	13	13	0	0	0	1	0	6.46	9.47	1.47	0.41	37.9	6.41	8.55	1.96	91.5	14.34	3.23978	172	40	115	83	21	23	11	18	109.5
12	1	28	21.78	16	2	1	0	6	10	12	0	0	0	0	0	6.13	4.74	0.77	0.23	33.9	5.94	5.54	2	91.15	9.6	2.16059	212	66	133	67	25	17	3	7	98.4
13	1	32	29.69	13	2	1	1	4.4	7	6	0	0	1	1	1	7.68	12.57	1.64	0.26	33.4	8.85	8.79	1.67	86	7.39	1.56923	203	70	120	67	19	16	3	8	422.9
14	1	18	29.3	15	1	1	1	15.6	8	7	0	0	0	0	0	5.42	10.34	1.91	0.35	27.8	7.1	10.84	5.62	89	11.3	2.48321	173	39	108	130	20	24	8	20	91
15	1	19	26.85	11	2	1	1	14.1	11	12	0	0	0	0	0	7.06	17.92	2.54	0.3	38.4	5.91	7.02	1.19	88	16.2	3.52	135	47	64	121	17	18	7	4	96.8
16	1	20	27.34	12	2	1	0	18.1	12	12	0	0	0	1	0	4.3	3.43	0.8	0.56	58	8.5	22.74	1.92	86.02	7.33	1.55686	148	54	83	56	15	16	1	2	116.5
17	1	19	28.98	12	2	1	0	24	12	12	0	0	0	0	0	5.89	9.91	1.68	0.52	68	11	8.08	1.16	89.69	19.38	4.29183	163	50	99	72	15	17	5	11	127.8
18	1	19	27.55	11	2	1	0	18.2	10	12	0	0	0	1	0	7.27	9.31	1.28	0.44	72	6.32	11.17	1.72	90.44	13.2	2.94767	201	62	125	70	25	35	1	9	101.6
19	1	22	18.73	13	1	1	1	10.1	10	12	0	0	0	0	0	9.4	7.48	0.8	0.23	42.8	6.88	17.57	0.86	75	13.2	2.44444	109	51	48	52	15	10	3	2	276.4
20	1	34	28.7	19	2	1	0	8	13	12	1	1	0	0	0	5.26	3.66	0.7	0.23	60.1	6.37	11.61	0.6	92.95	13	2.98358	122	52	48	110	19	16	2	2	102.2
21	1	28	29	12	1	0	0	10.3	12	10	0	0	0	0	1	4.76	3.21	0.67	0.42	146	3.79	10.1	1.41	95.98	19.95	4.7279	233	83	138	61	13	14	12	7	401
22	1	31	24.17	15	2	1	0	12.4	9	10	0	0	0	0	0	6.25	5.88	0.94	0.27	50.6	6.06	18.22	3.51	91.48	3.97	0.89673	180	62	107	57	15	9	1	4	201.6
23	1	34	23.88	12	1	1	1	15	13	12	1	1	0	0	0	8.12	12.93	1.59	0.38	81.7	9.86	15.42	2.06	94.04	8.07	1.87383	209	52	138	94	16	11	0.4	12	102.8
24	1	25	21.48	13	2	1	1	8.3	8	10	0	0	0	0	0	4.73	4.4	0.93	0.23	60.2	9.78	12.18	1.16	88.44	10.4	2.27105	185	69	93	114	15	16	1	4	496.3
25	1	22	17.36	12	2	1	1	14	13	13	0	0	0	0	0	6.35	11.88	1.87	0.3	71.3	24	13.66	0.75	97	7.77	1.86096	140	59	63	88	21	13	0.4	8	116.5
26	1	23	22.99	13	1	1	1	15.2	8	8	1	1	1	0	0	7.11	4.31	0.61	0.35	92.6	0.52	13.14	0.95	102.82	18.2	4.62055	177	57	102	89	11	8	1.8	4	122.2
27	1	19	25.96	14	2	1	1	18	12	10	0	0	0	1	1	5.79	5.11	0.88	0.16	62.5	5.48	4.79	1.28	94.76	17.92	4.19284	211	75	119	84	17	19	1.9	2	104.3
28	1	27	26.85	10	2	0	1	10	13	13	0	0	0	1	1	8.17	8.34	1.02	0.42	176	6.4	19.58	4.1	82	16.1	3.25975	197	70	111	81	19	15	2.1	2	1607.4
29	1	20	31.59	12	2	1	0	13.1	10	13	0	0	0	1	0	10.36	9.08	0.88	0.53	124	9.56	16.19	1.18	89.34	14.2	3.13241	266	71	157	190	15	20	9.1	15	226.3
30	1	23	22.03	13	2	1	1	8.7	10	9	0	0	0	1	0	7.34	8.68	1.18	0.36	39.5	5.66	20.75	1.24	109.57	7.14	1.93168	135	53	73	46	16	11	5.7	12	105.5
31	1	28	22.04	14	1	1	1	12.3	10	13	0	0	0	0	0	7.42	5.65	0.76	0.23	42.4	5.31	18.93	1.19	85.76	4.52	0.957124	168	57	99	61	13	9	4.1	5	195.6
32	1	31	30.84	12	2	1	0	8.3	12	12	1	0	0	0	0	7.6	15.37	2.02	0.31	28.2	6.49	13.2	2.95	98	14.2	3.43605	150	39	102	44	15	16	16.8	23	122.1
33	1	20	21.63	11	2	1	1	7.5	10	12	0	0	0	1	1	6.08	8.52	1.4	0.39	69.7	5.35	25.38	1.46	97.2	7.64	1.8336	127	48	70	47	18	18	1.1	3	96
34	1	28	19	15	2	1	0	11.9	9	10	0	0	0	1	0	7.16	12.01	1.68	0.34	115	13.8	19.22	1.03	91.32	5.44	1.22662	181	82	89	51	14	11	2.9	3	162.3
35	1	20	18.75	12	2	1	1	7	8	9	0	0	0	1	1	6.52	1.75	0.27	0.23	180	3.98	15.68	1.77	86.7	8.49	1.81749	229	88	117	120	11	8	4.6	3	171.6
36	1	34	33.2	14	2	1	0	22.9	14	13	1	1	1	0	0	5.29	10.84	2.05	0.26	22.7	14.81	8.22	2.44	100.2	12	2.96889	207	46	130	155	18	21	9.6	10	96.6
37	1	35	30	13	2	1	0	15.9	12	12	1	0	1	0	0	4.6	5.64	1.23	0.35	60.2	16.53	3.74	1.42	83.1	14.2	2.91363	220	34	400	155	22	36	12	8	121.8
38	1	19	28.13	10	2	1	1	5.4	7	10	0	0	0	0	0	7.1	6.16	0.87	0.62	21.2	7.05	9.68	2.3	110.83	63.19	17.2922	179	58	99	110	17	18.1	2.5	5	144.2
39	1	24	23.42	14	2	1	0	11.4	8	8	0	0	0	0	0	5.46	4.02	0.74	0.21	43.2	9.25	7.79	2.1	77.86	7.24	1.39187	149	56	83	52	21	28	4.8	4	99.4
40	1	24	22.66	13	2	1	0	9.1	8	7	0	0	0	1	0	6.46	8.01	1.24	0.32	60.8	8.21	8.64	1.64	90.98	11.2	2.51599	172	50	103	93	14	18	0.2	2	126.5
41	1	23	27.99	16	2	1	0	5.4	7	6	1	0	0	0	0	5.69	4.17	0.73	0.1	58.2	6.24	8.23	1.16	77	13.2	2.50963	164	58	76	150	13	11	8	20	120.2
42	1	20	19.72	14	2	1	1	6	5	5	0	0	0	0	0	5	7.35	1.47	0.18	28	18.46	7.56	1.06	102	11.2	2.82074	177	63	91	116	15	6	34	26	106.5
43	1	18	27.82	14	2	1	1	4.8	7	8	0	0	0	0	0	7.2	7.8	1.08	0.32	70	5.6	10.22	1.11	87	11.3	2.42741	147	41	97	44	18	23	3	2	166.4
44	1	31	26.72	14	1	1	1	14.5	15	13	1	0	1	0	0	6.9	8.8	1.28	0.21	142	18.8	7.72	4.38	92	8.56	1.94449	232	55	136	205	26	35	5	12	107.3
45	1	18	25	12	2	1	0	7.5	9	10	0	0	0	0	0	5.8	14.5	2.5	0.57	38.3	7.99	20.87	1.78	80.4	18.3	3.63289	203	63	129	55	16	15	0.2	4	106.1
46	1	28	32.85	10	2	1	0	11.3	11	13	0	0	0	1	0	5.5	11.71	2.13	0.44	62	5.67	6.35	0.82	90.59	13.5	3.01967	222	53	133	181	14	25	4	9	120
47	1	26	20.07	14	1	1	0	20.6	11	12	0	0	0	0	0	6.73	5.92	0.88	0.21	56.4	12.02	12.11	1.15	91	3.72	0.835852	161	45	91	124	19	15	0.2	7	222.3
48	1	19	22.59	13	2	1	1	16	11	10	0	0	0	1	0	5.96	7.38	1.24	0.17	33.5	5.79	10.46	1.32	86.38	7.15	1.52498	130	44	71	75	15	14	7	4	101.6
49	1	21	25.26	10	1	1	1	12.5	13	13	1	0	1	1	0	6.06	5.19	0.86	0.28	67.4	9.72	3.7	0.72	90.4	9.69	2.1629	139	33	91	77	12	23	0.3	2	260.2
50	1	27	21.67	12	2	1	0	11.2	10	13	0	0	0	0	0	7.34	6.6	0.9	0.38	45.6	4.13	13.69	2.91	93.98	8.88	2.0606	147	58	81	38	17	12	1	7	376.3
51	1	28	27.06	14	2	1	0	21.1	13	12	1	0	0	1	0	8.13	18.27	2.25	0.24	26.9	8.21	12.11	0.88	95.17	9.34	2.19478	125	55	61	47	22	26	6	13	126.5
52	1	30	36.51	13	2	1	0	11.4	12	11	1	0	0	0	0	6.94	3.19	0.46	0.36	23.3	3.76	12.11	0.88	80	18.2	3.59506	184	56	106	118	20	30	7	5	131.1
53	1	28	30.84	12	2	1	1	16.4	10	11	0	0	0	0	0	5.62	4.43	0.79	0.17	66.2	6.79	8.3	1.21	94	21	4.87407	167	68	70	143	15	16	1	7	1854.5
54	1	22	22.83	13	2	1	0	9.1	12	11	0	0	0	1	1	6.44	1.12	0.17	0.22	53.4	3.86	17.16	1.18	80	14.2	2.80494	164	56	63	224	17	11	7	12	96.4
55	1	32	25.16	13	1	0	0	11.7	13	12	0	0	0	1	0	5.72	4.59	0.8	0.25	67.8	7.21	10.16	1.23	100	6.61	1.6321	189	54	125	52	19	29	1	2	391.5
56	1	21	22.66	11	2	1	0	10.3	10	8	0	0	0	0	0	6.84	8.88	1.3	0.33	54.8	5.85	13.61	1.35	98	5.41	1.30909	155	44	97	68	21	19	1	2	122.6
57	1	29	29.24	13	2	1	0	7.3	11	7	1	0	0	1	0	6.07	6.02	0.99	0.17	92.1	3.21	14.1	1.31	98	12.02	2.90854	149	47	87	76	16	13	5	17	99.8
58	1	18	29.07	15	2	1	1	9.4	13	11	0	0	0	0	0	4.66	4.12	0.88	0.45	38.2	7.21	7.9	1.92	97	12.53	3.00101	256	55	179	112	16	7	4	41	91.9
59	1	19	37.98	12	2	1	1	21.1	13	12	0	0	0	1	1	7.87	9	1.14	0.22	21.4	2.3	7.87	1.94	89	17.25	3.79074	141	38	71	160	17	27	13	3	120
60	1	28	34.08	15	2	1	1	8.8	8	13	0	0	1	0	0	5.53	6.14	1.11	0.32	19.9	9.44	9.94	1.31	93	11.24	2.58104	141	37	83	103	18	21	13	10	266.4
61	1	29	40.4	13	2	1	1	7	7	7	1	0	0	0	0	6.49	5.32	0.82	0.32	57	4.62	11.2	1.71	98	32.29	7.81338	213	49	139	127	17	15	18	20	471.3
62	1	23	21.26	14	2	0	0	17.5	8	12	0	0	0	0	0	7.86	5.03	0.64	0.33	47.5	2.84	11.4	3.54	95	8.19	1.92111	191	62	104	125	12	15	4	4	202.1
63	1	21	29.36	13	2	1	1	14.1	7	8	0	0	0	1	1	8.06	8.46	1.05	0.31	18.4	6.22	5.92	1.34	94	10.34	2.3999	200	60	120	99	18	16	12	20	126.2
64	1	19	21.56	13	2	1	0	11.7	8	7	0	0	0	0	0	5.75	2.86	0.5	0.17	92	10.23	6.54	0.95	87	8.71	1.87104	144	52	72	99	18	28	10	9	104.1
65	0	24	24.49	15	1	1	0	2.8	6	6	1	0	0	1	0	6.99	10.77	1.54	0.33	75	8.01	5.74	1.49	70	11.3	1.95309	205	64	121	101	24	14	2	5	304
66	0	29	17.97	12	1	0	0	3.5	6	6	0	1	0	1	0	6.43	11.41	1.77	0.13	127	4.15	10.61	1.73	72	9.8	1.74222	187	43	106	191	23	22	1	7	133.3
67	0	18	29.3	12	1	1	0	4.6	9	8	0	0	0	0	0	4.72	4.47	0.95	0.33	47.8	4.88	13.86	3.45	84	12.59	2.61126	131	53	71	35	14	10	4	8	146.5
68	0	29	28.58	12	1	1	0	3.9	6	6	0	0	0	1	0	6.67	4.41	0.66	0.19	28.8	2.05	17.93	1.47	72	12.1	2.15111	165	45	84	182	12	12	13	22	104.5
69	0	24	21.09	13	1	1	1	2.3	5	6	0	0	0	0	0	7.45	6.15	0.83	0.21	106.9	1.97	9.55	1	92	10.2	2.31704	120	53	59	40	13	7	1	2	1961.2
70	0	22	25	12	2	1	1	5.2	6	3	1	0	0	1	0	11.11	3.7	0.33	0.24	62.6	1.53	10.83	2.34	87	3.94	0.84637	137	48	80	47	11	7	1	2	133.8
71	0	22	26.17	11	1	0	0	10.9	7	4	1	0	0	0	0	9.09	5.12	0.56	0.21	78	0.47	15.47	1.79	94	10.34	2.3999	223	46	141	182	17	12	1	2	126.6
72	0	28	27.89	13	1	1	0	7.3	9	10	0	0	0	0	0	5.4	10.69	1.98	0.23	45.5	4.04	8.28	3.81	87	11.2	2.40593	196	49	99	238	35	122	5.2	7	101.1
73	0	21	33.8	13	1	1	0	9.4	7	8	0	0	0	0	1	6.07	3.13	0.52	0.14	44.7	3.69	12.08	2.06	91	12.37	2.77943	169	62	80	133	16	15	15	20	158
74	0	31	20.03	13	1	1	1	3.2	8	8	1	0	0	0	0	8.74	3.52	0.4	0.21	79.2	1.52	6.99	0.1	80	12.1	2.39012	137	44	72	104	12	10	8	5	121.3
75	0	32	30.45	14	1	1	0	9.4	8	9	0	0	0	1	0	5.7	3.28	0.58	0.34	81	3	18.85	3.89	80	10.44	2.06222	154	37	84	166	14	14	9	2	202.2
76	0	25	21.23	12	1	0	1	7.8	8	8	0	0	0	1	1	6.37	3.96	0.62	0.25	76.2	4.42	12.2	1.3	85	12	2.51852	172	62	99	118	19	13	4	8	306.5
77	0	22	23.44	13	1	0	0	6.3	8	6	0	0	0	0	0	11.34	5.22	0.46	0.12	68	0.79	6.86	1.23	75	12.8	2.37037	200	57	129	69	11	7	1	2	122
78	0	21	31.14	14	1	0	0	7.1	8	7	0	0	0	1	1	7.29	6.57	0.9	0.21	90	1.97	11.56	0.79	70	13.1	2.2642	219	79	109	156	17	23	1	2	276.9
79	0	19	19.95	13	1	1	0	3.9	8	7	0	0	1	0	1	7.68	9.19	1.2	0.14	111.9	1.19	8.04	1.48	92	4.13	0.938173	173	54	98	105	16	16	6	2	94.1
80	0	22	24.98	13	1	1	0	4.3	6	6	0	0	0	0	0	5.71	5.23	0.92	0.31	38.9	5.05	15.19	1.38	93	12.73	2.92319	149	54	78	84	15	8	5	6	133.3
81	0	28	24.44	10	1	1	0	5.9	5	6	1	1	0	0	0	8.61	5.67	0.66	0.21	106.8	2.78	31.31	1.51	93	5.62	1.29052	108	44	55	43	11	11	4	9	94.5
82	0	25	20.55	13	1	1	0	5.2	5	5	0	0	0	1	0	6.94	3.74	0.54	0.34	180	5.47	7.4	1.31	86	4.95	1.05111	226	112	103	53	27	24	1	11	141.5
83	0	39	33.2	12	1	1	0	6	9	10	1	1	0	0	0	8.11	3.83	0.47	0.19	29.9	0.63	5.44	2.02	90	11.25	2.5	128	36	74	88	14	12	3	3	107.8
84	0	25	19.43	12	1	0	0	10.9	10	9	0	0	0	0	1	3.59	4.39	1.22	0.28	70.2	8.93	5.44	0.79	92	2.43	0.552	169	67	96	29	14	9	23	8	104
85	0	22	24.69	14	1	1	1	5.4	4	5	0	0	0	0	0	6.68	2.37	0.35	0.3	33.3	6.56	7.71	3.07	92	8.65	1.96494	163	45	93	125	16	21	9	7	103.1
86	0	27	19.81	12	1	0	0	6.1	7	5	0	0	0	0	0	6.34	5.79	0.91	0.23	70.3	5.23	33.12	1.36	77	10.87	2.06664	218	60	138	102	13	9	1	9	706.6
87	0	25	22.27	11	1	0	0	4.3	8	8	0	0	0	0	0	4.8	4.75	0.99	0.2	62.9	5.59	24.7	4.14	73	2.98	0.537136	178	54	105	115	12	5	5	3	105.9
88	0	29	23.73	12	1	1	1	4.3	7	8	0	0	0	0	0	6.3	5.83	0.93	0.32	95.1	10.4	10.29	1.38	94	7.78	1.80573	175	63	91	107	15	11	3	5	871.3
89	0	28	18.75	12	1	0	0	4.1	8	8	0	0	0	1	1	6.2	1.8	0.29	0.15	123	3.29	6.16	0.86	95	14.16	3.32148	143	56	75	59	11	9	1	2	206.3
90	0	21	18.34	15	1	1	1	9.8	6	8	0	0	0	0	1	6.78	4.84	0.71	0.27	43.4	4.63	11.12	1.19	84	3.83	0.79437	138	43	69	132	18	12	1	3	133.6
91	0	23	20.9	14	1	0	0	4.3	7	6	0	0	0	0	0	4.12	1.49	0.36	0.19	126	4.08	14.69	1.71	74	11	2.00988	194	85	98	55	15	18	1	2	201.8
92	0	28	24.8	12	1	0	0	11.7	5	8	0	0	0	1	1	6.94	2.94	0.42	0.14	180	0.99	6.68	1.92	82	19	3.84691	184	46	93	227	21	18	17	9	1504.2
93	0	27	25.24	12	1	0	0	5.7	9	9	0	0	0	0	0	6.4	6.25	0.98	0.13	86	3.54	8.32	0.13	99	23	5.62222	173	46	94	167	15	12	2	8	301.5
94	0	32	32.44	12	1	1	1	4.5	6	6	0	0	0	0	0	5.08	3.52	0.69	0.2	58.5	3	7.62	1	116	33	9.45185	173	39	101	166	13	19	13	19	207.4
95	0	18	16.73	12	1	1	0	5.7	6	6	0	0	0	1	0	8.55	3.72	0.44	0.16	66.5	2.52	7.92	4.74	96	7.53	1.78489	163	48	107	41	14	11	1	11	105.1
96	0	26	23.44	11	1	0	0	5.7	7	8	0	0	0	0	0	4.74	4.7	0.99	0.33	66.5	3.5	18.32	1.2	108	12.1	3.22667	199	69	119	56	15	11	1	4	416
97	0	21	20.7	13	1	0	0	4.1	6	5	0	0	0	0	0	13.24	5.04	0.38	0.23	58.4	1.34	11.45	1.48	79	54.14	10.5606	208	48	134	131	23	33	0.2	13	380.2
98	0	21	22.04	11	1	0	0	4.5	7	7	1	0	0	0	0	6.38	3.96	0.62	0.22	89.7	1.75	5.11	1.47	89	5.12	1.12514	217	48	148	106	18	11	4	12	316.5
99	0	28	21.48	12	1	0	0	4.5	9	8	0	0	0	0	0	6.08	2.49	0.41	0.17	65	5	10.38	1.81	74	7.54	1.37768	174	67	94	66	14	11	1	12	270.4
100	0	21	22.03	15	1	1	1	5.1	6	5	0	0	0	0	0	13.83	6.14	0.44	0.33	53.8	3.77	11.11	0.88	103	4.88	1.24109	219	77	127	76	20	18	1	20	310.1
101	0	36	23.34	13	1	1	0	4.3	8	8	0	0	1	1	0	8.03	3.95	0.49	0.27	71.8	1.05	9.11	2.06	89	6.23	1.36906	243	56	155	160	24	21	0.6	2	103.6
102	0	24	21.48	12	1	0	1	7.1	6	8	0	0	0	0	0	8.32	3.73	0.45	0.21	55.6	2.13	13.09	1.3	91	7.71	1.73237	120	60	53	34	15	14	1	2	1667.5
103	0	21	21.19	11	1	0	0	7.1	7	6	0	0	0	0	0	7.83	9.83	1.26	0.32	43.1	5.53	12.08	1.21	62	18	2.75556	204	66	121	83	19	22	7	20	140.2
104	0	41	25.91	13	1	1	0	5.7	6	8	0	0	1	1	0	9.52	3.47	0.36	0.32	53.6	0.78	7.54	1.06	108	5.07	1.352	215	53	131	153	19	21	1	10	109.6
105	0	22	20.03	12	1	0	0	7.1	7	8	0	0	0	0	0	3.38	1.89	0.56	0.21	35.7	6.38	21.4	0.88	90	8.2	1.82222	140	53	70	86	13	11	5.4	8	206.5
106	0	23	21.48	12	1	0	0	5.9	7	6	1	0	0	0	0	6.24	4.59	0.74	0.14	84.9	0.81	7.58	5.09	93	3.85	0.884074	181	71	98	62	18	15	3	3	316.8
107	0	22	23.81	12	1	1	0	4.1	6	6	1	0	0	0	0	41.75	50.76	1.22	0.28	89.4	0.05	12.25	1.91	100	4.9	1.20988	224	68	144	62	16	12	2.9	5	209.6
108	0	21	25.71	13	2	0	0	4.2	6	6	1	0	0	0	0	4.05	10.1	2.49	0.4	75.5	0.32	24.29	1.67	99	7.35	1.79667	200	62	114	121	19	14	6	7	391.9
109	0	28	25.26	13	1	1	0	3.2	6	6	0	0	0	1	1	5.52	3.71	0.67	0.2	40.3	1.56	11.88	2.31	95	4.18	0.980494	172	58	97	84	15	14	0.3	6	274
110	0	24	20.28	13	1	1	0	3.1	6	5	0	0	0	0	0	4.34	5.38	1.24	0.3	87.8	4.37	19.91	1.46	70	14.8	2.55802	128	73	45	49	26	28	5	2	976.1
111	0	30	19.81	13	1	0	0	8	11	10	0	0	0	1	1	7.82	7.15	0.91	0.31	75.8	7.38	17.06	3.65	66	9.2	1.49926	154	54	90	51	13	14	4	2	416.3
112	0	29	20.58	15	1	0	0	9.1	6	8	0	0	0	0	0	10.51	4.37	0.42	0.19	104.7	4.03	8.33	0.97	91	9.2	2.06716	187	78	87	111	33	22	0.2	4	281.3
113	0	23	15.6	12	2	1	0	6.2	8	9	0	0	0	1	0	6.57	6.24	0.95	0.25	75	10.46	7.2	1.23	91	6.04	1.35714	169	83	71	73	21	22	1	2	244.3
114	0	29	18.61	17	1	1	0	4.5	5	6	0	0	0	1	0	8.66	7.07	0.82	0.13	104.6	5.01	12.87	1.89	72	9.2	1.63556	183	57	113	67	19	31	4	2	96.1
115	0	22	22.41	13	1	0	1	5.4	7	8	0	0	0	0	0	6.89	5.7	0.83	0.25	66.7	3.6	8.76	8.79	92	10.9	2.47605	195	65	103	137	18	14	5	11	105.9
116	0	31	26.22	16	2	1	0	9	6	5	1	1	0	0	0	6.67	3.38	0.51	0.15	85.1	3.9	9.79	2.94	78	13.9	2.67704	166	55	101	48	17	18	1	11	188.1
117	0	23	22.46	11	1	1	0	9.4	8	6	1	0	1	0	0	7.86	7.31	0.93	0.21	91.1	1.54	9.46	2.3	88	4.01	0.871309	196	79	99	88	15	12	5	6	140
118	0	20	28.7	13	1	1	0	4.1	8	6	0	0	0	1	0	9.42	5.79	0.61	0.21	36	1.9	13.82	1.76	80	12.77	2.52247	162	42	100	99	12	19	8	9	184.3
119	0	30	24.61	12	2	0	0	4.1	8	5	0	0	1	0	0	9.07	7.89	0.87	0.12	111.5	4.08	28.53	2.53	91	4.89	1.09874	128	55	59	69	14	11	5.3	10	1810.9
120	0	23	19.81	12	1	0	0	4.1	8	6	0	0	0	0	0	5.82	3.92	0.67	0.23	83	3.8	8.54	1.55	79	12.8	2.49679	175	60	100	100	16	7	5.2	5	206.3
121	0	18	20.7	11	2	0	1	3.9	7	6	0	0	0	0	0	4.66	7.21	1.55	0.32	91.4	7	15.78	0.9	95	8.8	2.0642	127	95	72	61	22	24	1	3	366.7
122	0	27	21.3	11	2	0	0	4.8	8	9	1	0	0	0	0	11.8	6.62	0.56	0.16	122	6.67	9.05	0.82	96	10.1	2.39407	191	41	96	272	22	36	2.7	4	405.8
123	0	20	23.31	12	1	0	0	9.5	6	8	1	0	0	0	0	5.67	5.9	1.04	0.17	71.2	1.69	13.27	1.13	84	11.1	2.30222	135	58	65	61	13	16	13	9	388.6
124	0	20	23.62	11	2	0	0	6.9	8	5	0	0	1	0	0	6.26	5.94	0.95	0.17	99.2	7.73	9.2	5.6	82	12.6	2.55111	174	60	98	80	11	7	2.9	2	410.1
125	0	28	23.51	12	1	0	0	5.9	8	9	0	0	0	0	0	11.28	5.75	0.51	0.16	39.6	2.33	8.92	1.16	99	7.85	1.91889	155	46	79	152	17	6	1.6	2	216.9
126	0	20	35	12	2	0	0	9.2	10	8	0	0	0	0	0	5.41	3.27	0.6	0.21	63	3.7	8.86	1.25	80	11.2	2.21235	170	58	98	110	14	19	5	26	281.4
127	0	18	24.39	11	2	0	0	8.2	8	8	0	0	0	0	0	5.02	4.46	0.89	0.39	75.2	6.94	16.89	2.17	89	7.87	1.72946	172	83	79	49	14	13	7	7	202.5
128	0	18	24.22	13	1	0	0	5.1	8	9	0	0	0	0	0	9.75	5.53	0.57	0.14	70.3	0.85	10.04	1.16	70	6.99	1.20815	138	63	63	58	15	10	27	8	270.1
